# Supplementary material for: High-Throughput Gene and Protein Analysis Revealed the Response of Disc Cells to Vitamin D, Depending on the VDR FokI Variants
Source: MDPI journal article supplement (doi:10.3390/ijms22179603), 2021-09-04
Supplement: s1 [file s1]

Table S2: detection range and sensitivity of analytes of the custom Human Magnetic Luminex Screening Assay..

| Anlayte | Detection range (pg/mL) | Sensitivity (pg/mL) |
|---------|-------------------------|---------------------|
| BMP-2   | 16.5-4000               | 3.6                 |
| BMP-7   | 103-25000               | 8.56                |
| IL-1Ra  | 28.8-7000               | 18.0                |
| IL-2    | 30.9-7500               | 1.8                 |
| IL-3    | 78.2-19000              | 11.6                |
| IL-6    | 4.53-1100               | 1.7                 |
| IL-17A  | 13.2-3200               | 1.8                 |
| MMP-1   | 49.4-12000              | 2.7                 |
| MMP-3   | 82.3-20000              | 5.3                 |
| MMP-13  | 144-35000               | 19.0                |
