# Supplementary material for: High-Throughput Gene and Protein Analysis Revealed the Response of Disc Cells to Vitamin D, Depending on the VDR FokI Variants
Source: MDPI journal article supplement (doi:10.3390/ijms22179603), 2021-09-04
Supplement: s1 [file s1]

Table S1: fold changes (Fc) of genes modulation vitamin D mediated depending on the presence of FokI receptor variants.

|                     | Basal        |           |                |           | Inflamed     |           |                |           |
|---------------------|--------------|-----------|----------------|-----------|--------------|-----------|----------------|-----------|
|                     | Up-regulated |           | Down-regulated |           | Up-regulated |           | Down-regulated |           |
|                     | <i>FF</i>    | <i>Ff</i> | <i>FF</i>      | <i>Ff</i> | <i>FF</i>    | <i>Ff</i> | <i>FF</i>      | <i>Ff</i> |
| <i>A2M</i>          | 3.41         |           |                |           |              |           |                | 0.43      |
| <i>ABCG1</i>        | 4.62         |           |                | 0.41      |              |           | 0.49           |           |
| <i>ACAN</i>         | 2.63         |           |                |           |              |           |                |           |
| <i>ACVR1C</i>       | 2.27         |           |                | 0.37      |              |           |                | 0.40      |
| <i>ADAMTS15</i>     | 26.74        | 2.17      |                |           | 2.44         |           |                | 0.08      |
| <i>ADAMTS4</i>      |              |           | 0.47           |           |              |           |                | 0.39      |
| <i>ADAMTS9</i>      |              | 2.46      | 0.39           |           |              |           | 0.46           |           |
| <i>ADH1B</i>        | 34.26        |           |                |           | 9.51         |           |                | 0.33      |
| <i>ADIG</i>         |              |           |                | 0.36      |              |           | 0.21           |           |
| <i>ADIPOQ</i>       |              |           | 0.38           | 0.34      |              |           |                |           |
| <i>AGTR1</i>        | 2.96         |           |                |           |              |           |                | 0.38      |
| <i>ALCAM</i>        |              |           | 0.42           |           |              | 2.04      |                |           |
| <i>ALPL</i>         | 2.41         | 2.62      |                |           |              |           | 0.41           |           |
| <i>AMIGO2</i>       |              |           | 0.08           |           |              | 14.33     |                |           |
| <i>Amphiregulin</i> |              |           |                | 0.35      |              |           |                |           |
| <i>ANGPTL4</i>      |              | 2.09      |                |           |              |           |                | 0.48      |
| <i>ANKH</i>         | 2.55         |           |                |           |              |           |                | 0.42      |
| <i>ANKRD1</i>       |              |           | 0.20           | 0.50      |              | 3.76      |                |           |
| <i>ANLN</i>         |              |           | 0.24           | 0.49      |              | 10.39     |                |           |
| <i>ANPEP</i>        |              |           | 0.33           |           |              | 3.68      |                |           |
| <i>ANXA6</i>        |              |           |                |           |              |           | 0.33           |           |
| <i>ANXA11</i>       | 2.04         |           |                |           |              |           |                |           |
| <i>APOE</i>         | 4.95         |           |                |           |              |           |                | 0.35      |
| <i>APOL6</i>        | 2.88         |           |                |           |              |           |                | 0.45      |
| <i>AQP1</i>         | 7.26         |           |                |           | 3.61         |           |                | 0.34      |
| <i>ARHGAP26</i>     | 4.64         |           |                |           | 2.24         |           |                | 0.34      |

|                |      |       |      |      |      |       |      |      |
|----------------|------|-------|------|------|------|-------|------|------|
| <b>ARPP21</b>  |      |       | 0.30 | 0.34 |      |       |      | 0.35 |
| <b>ASP</b>     | 7.87 |       |      |      |      |       | 0.39 | 0.18 |
| <b>ATP1A2</b>  | 6.59 |       |      |      | 3.45 |       |      | 0.13 |
| <b>ATRNL1</b>  | 4.47 | 2.21  |      |      |      |       |      |      |
| <b>BACE2</b>   |      |       | 0.41 |      |      | 2.11  |      |      |
| <b>BCAM</b>    | 2.27 |       |      |      |      |       |      | 0.50 |
| <b>BCL2A1</b>  |      | 2.40  | 0.28 |      |      | 3.28  |      |      |
| <b>BCL2L13</b> | 2.61 |       |      |      | 3.30 |       |      | 0.45 |
| <b>BDNF</b>    |      |       | 0.18 |      |      | 3.32  |      |      |
| <b>BGLAP</b>   |      | 2.17  |      |      |      |       |      | 0.34 |
| <b>BGN</b>     | 2.35 |       |      |      |      |       |      | 0.34 |
| <b>BID</b>     |      |       | 0.41 |      |      | 2.02  |      |      |
| <b>BMP2</b>    |      | 3.13  | 0.31 |      |      | 2.28  |      |      |
| <b>BMP7</b>    | 5.01 |       |      | 0.36 |      |       |      |      |
| <b>BMPR1B</b>  |      |       | 0.30 |      |      |       | 0.43 |      |
| <b>BORA</b>    |      |       | 0.37 |      |      | 2.63  |      |      |
| <b>BST2</b>    |      | 4.37  | 0.16 |      | 7.44 | 14.37 |      |      |
| <b>C1QTNF1</b> |      |       | 0.18 |      |      | 4.83  |      |      |
| <b>C2CD4A</b>  |      | 2.42  | 0.21 |      |      | 2.52  |      |      |
| <b>C7</b>      |      |       |      | 0.34 |      |       |      |      |
| <b>C7orf69</b> |      |       | 0.45 | 0.34 | 6.88 | 2.46  |      |      |
| <b>CANX</b>    |      |       | 0.41 |      |      |       |      |      |
| <b>CCL13</b>   | 3.48 |       |      | 0.33 |      | 2.83  | 0.49 |      |
| <b>CCL2</b>    |      | 3.14  | 0.10 |      |      | 2.97  |      |      |
| <b>CCL20</b>   |      | 21.60 | 0.01 |      |      | 29.30 |      |      |
| <b>CCL3</b>    |      | 2.97  | 0.09 |      |      | 6.01  |      |      |
| <b>CCL4</b>    |      | 4.37  | 0.22 |      | 2.07 | 3.38  |      |      |
| <b>CCL5</b>    |      | 5.73  | 0.01 |      |      | 24.11 |      |      |
| <b>CCL7</b>    |      | 2.41  | 0.11 |      |      | 2.87  |      |      |
| <b>CCNA2</b>   |      |       | 0.20 |      |      | 10.62 |      |      |
| <b>CCR1</b>    | 5.82 | 2.26  |      |      |      |       |      | 0.14 |

|                 |       |      |      |      |       |      |      |      |
|-----------------|-------|------|------|------|-------|------|------|------|
| <b>CCR2</b>     | 2.01  |      |      | 0.34 | 2.71  |      |      | 0.08 |
| <b>CCR3</b>     | 4.36  | 4.59 |      |      |       |      | 0.40 | 0.32 |
| <b>CCR5</b>     | 3.75  | 2.10 |      |      | 57.89 |      |      |      |
| <b>CCR6</b>     |       |      |      | 0.34 |       |      |      |      |
| <b>CD14</b>     | 3.42  | 7.39 |      |      |       |      |      | 0.08 |
| <b>CD146</b>    |       | 2.32 | 0.22 |      |       | 3.98 |      |      |
| <b>CD168</b>    |       |      | 0.18 | 0.49 |       | 9.61 |      |      |
| <b>CD24</b>     | 2.45  |      |      |      |       |      |      |      |
| <b>CD271</b>    |       | 2.47 |      |      |       |      | 0.39 |      |
| <b>CD45</b>     |       |      |      | 0.38 | 2.07  |      |      |      |
| <b>CD54</b>     |       | 2.22 | 0.39 |      |       | 2.30 |      |      |
| <b>CD69</b>     |       |      |      | 0.35 |       |      |      |      |
| <b>CD73</b>     |       |      | 0.46 |      |       | 2.01 |      |      |
| <b>CDC42EP4</b> | 2.10  |      |      |      |       |      |      |      |
| <b>CDH13</b>    |       |      | 0.49 |      |       |      |      |      |
| <b>CDH19</b>    |       |      | 0.28 | 0.34 |       | 2.18 |      |      |
| <b>CDH2</b>     |       |      |      | 0.48 |       |      |      |      |
| <b>CDKN1A</b>   | 2.49  |      |      |      |       |      |      |      |
| <b>CDS1</b>     | 3.27  | 3.06 |      |      |       |      |      | 0.43 |
| <b>CEBPA</b>    | 2.30  | 3.21 |      |      |       |      |      | 0.20 |
| <b>CES1</b>     | 13.09 | 2.20 |      |      |       |      |      | 0.08 |
| <b>CFLAR</b>    |       | 2.26 |      |      |       |      |      |      |
| <b>CFTR</b>     |       |      |      | 0.36 |       |      |      |      |
| <b>CHI3L2</b>   |       |      |      |      |       |      |      | 0.46 |
| <b>CLDN11</b>   | 6.13  |      |      | 0.35 |       |      | 0.26 | 0.30 |
| <b>CLEC1A</b>   | 2.05  |      |      | 0.35 |       |      |      |      |
| <b>CLEC2B</b>   | 2.70  |      |      | 0.09 |       |      |      | 0.44 |
| <b>CLEC3A</b>   |       |      |      | 0.36 | 2.51  |      |      |      |
| <b>CLEC3B</b>   | 4.24  |      |      | 0.38 |       |      |      |      |
| <b>CLGN</b>     |       |      |      |      |       | 2.05 |      |      |
| <b>CLIC6</b>    |       | 2.41 |      |      |       |      |      |      |

|                |      |        |      |      |      |       |      |      |
|----------------|------|--------|------|------|------|-------|------|------|
| <b>CLIP2</b>   | 2.80 |        |      | 0.36 |      |       |      | 0.37 |
| <b>CMPK2</b>   |      | 2.27   | 0.45 |      | 2.11 | 2.46  |      |      |
| <b>CNR1</b>    |      |        |      | 0.37 |      |       |      | 0.43 |
| <b>COL10A1</b> | 2.65 | 2.85   |      |      |      |       |      |      |
| <b>COL11A1</b> |      |        |      |      |      | 2.07  |      |      |
| <b>COL11A2</b> | 3.92 | 4.47   |      |      |      |       | 0.48 | 0.37 |
| <b>COL14A1</b> | 3.51 |        |      |      |      |       |      | 0.35 |
| <b>COL15A1</b> | 2.99 |        |      | 0.47 | 2.09 |       |      |      |
| <b>COL2A1</b>  | 3.79 |        |      | 0.39 |      |       | 0.38 | 0.39 |
| <b>COL4A1</b>  |      |        |      |      |      | 2.91  |      |      |
| <b>COL5A3</b>  | 4.99 |        |      |      | 2.23 |       |      |      |
| <b>COL9A1</b>  |      |        |      | 0.34 | 2.23 |       |      |      |
| <b>COL9A2</b>  | 3.90 |        |      |      |      |       |      | 0.36 |
| <b>COL9A3</b>  | 7.77 |        |      | 0.37 |      |       |      | 0.17 |
| <b>COMP</b>    | 2.52 | 2.18   |      |      |      |       | 0.49 |      |
| <b>CRHR1</b>   | 4.07 |        |      |      |      |       |      |      |
| <b>CRTAP</b>   | 2.26 | 5.03   |      |      |      |       |      |      |
| <b>CRYAB</b>   | 2.21 |        |      |      |      |       |      |      |
| <b>CSAD</b>    | 2.15 |        |      |      |      |       |      |      |
| <b>CSF1</b>    |      | 2.18   | 0.16 |      |      | 2.62  |      |      |
| <b>CSF2</b>    |      |        | 0.00 |      |      | 13.60 |      |      |
| <b>CSF3</b>    |      | 7.53   | 0.05 |      |      |       |      |      |
| <b>CSPG5</b>   |      |        |      |      | 2.73 |       |      |      |
| <b>CXCL1</b>   |      | 20.02  | 0.00 |      |      | 7.13  |      |      |
| <b>CXCL2</b>   |      | 5.63   | 0.05 |      |      | 5.41  |      |      |
| <b>CXCL5</b>   |      | 3.94   | 0.03 |      |      | 2.24  |      |      |
| <b>CXCL6</b>   |      | 411.11 | 0.00 |      |      | 3.46  |      |      |
| <b>CXCL8</b>   |      | 78.95  | 0.00 |      |      | 7.24  |      |      |
| <b>CXCR1</b>   |      | 2.13   | 0.29 |      |      | 2.14  |      |      |
| <b>CXCR2</b>   | 3.50 |        |      | 0.33 |      | 3.29  |      |      |
| <b>DCBLD1</b>  |      |        | 0.43 |      |      |       |      |      |

|                |      |      |      |      |       |      |      |  |
|----------------|------|------|------|------|-------|------|------|--|
| <b>DCN</b>     | 4.66 |      |      | 0.32 |       |      |      |  |
| <b>DDR1</b>    |      |      |      |      |       |      | 0.42 |  |
| <b>DGAT2</b>   | 2.05 |      |      |      |       | 0.43 |      |  |
| <b>DKK1</b>    |      |      | 0.43 |      |       |      | 0.45 |  |
| <b>DNER</b>    |      |      | 0.07 |      | 13.49 |      |      |  |
| <b>DSG2</b>    | 2.09 |      |      |      |       |      |      |  |
| <b>DUOX1</b>   | 4.38 | 4.27 |      |      |       |      | 0.23 |  |
| <b>EFEMP1</b>  |      | 2.00 | 0.46 |      |       |      |      |  |
| <b>EFNB2</b>   |      |      |      |      | 3.02  |      |      |  |
| <b>EHF</b>     |      |      | 0.20 | 0.35 | 2.39  | 0.42 |      |  |
| <b>ELN</b>     |      | 9.63 | 0.42 |      | 2.28  |      |      |  |
| <b>EPHX1</b>   | 2.31 |      |      |      |       |      |      |  |
| <b>EPYC</b>    | 2.91 |      |      | 0.34 |       | 0.43 |      |  |
| <b>F2RL1</b>   |      |      | 0.38 |      | 3.47  |      |      |  |
| <b>FABP4</b>   | 2.57 |      |      | 0.34 |       | 0.26 | 0.23 |  |
| <b>FAT3</b>    |      |      |      |      |       |      | 0.40 |  |
| <b>FBLN5</b>   | 2.25 |      |      |      |       |      | 0.41 |  |
| <b>FGF18</b>   | 3.19 |      |      | 0.48 |       | 0.41 | 0.25 |  |
| <b>FGF4</b>    |      |      |      | 0.34 |       |      |      |  |
| <b>FGF6</b>    |      |      |      | 0.34 |       |      |      |  |
| <b>FGF7</b>    |      | 2.06 | 0.43 |      |       |      |      |  |
| <b>FLRT2</b>   |      | 3.87 |      |      |       |      |      |  |
| <b>FMOD</b>    |      |      |      |      |       |      | 0.37 |  |
| <b>FRZB</b>    | 5.34 |      |      | 0.38 | 2.33  |      | 0.27 |  |
| <b>FZD3</b>    |      | 2.34 |      |      |       |      | 0.39 |  |
| <b>FZD5</b>    |      | 2.31 |      |      |       |      |      |  |
| <b>FZD6</b>    |      |      | 0.50 |      |       |      |      |  |
| <b>FZD8</b>    |      |      | 0.42 |      |       |      |      |  |
| <b>GAB3</b>    | 2.52 | 2.97 |      |      |       |      | 0.39 |  |
| <b>GABRB1</b>  |      |      | 0.48 |      |       | 4.21 |      |  |
| <b>GALNT15</b> |      |      |      |      |       |      | 0.41 |  |

|               |      |      |      |      |      |       |      |      |
|---------------|------|------|------|------|------|-------|------|------|
| <b>GDF6</b>   |      |      | 0.21 |      |      | 2.98  |      |      |
| <b>GHR</b>    |      | 2.27 |      |      |      |       | 0.45 | 0.46 |
| <b>GIMAP8</b> | 2.54 |      |      | 0.39 |      | 3.57  |      |      |
| <b>GPC3</b>   | 3.36 |      |      | 0.34 |      |       |      | 0.24 |
| <b>GPD1</b>   | 2.09 |      |      |      |      |       |      | 0.39 |
| <b>GPD1L</b>  | 2.24 |      |      |      |      |       |      | 0.48 |
| <b>GPR133</b> | 6.53 | 3.79 |      |      |      |       |      | 0.10 |
| <b>GPRC5B</b> | 6.68 | 2.21 |      |      |      |       | 0.41 | 0.18 |
| <b>GPT2</b>   |      |      | 0.48 |      |      |       |      |      |
| <b>HAPLN1</b> |      |      | 0.43 |      |      | 3.32  |      |      |
| <b>HBB</b>    | 3.14 |      |      | 0.37 |      |       |      | 0.37 |
| <b>HIF1A</b>  |      |      | 0.48 |      |      |       |      |      |
| <b>HLX</b>    | 2.08 |      |      |      |      |       |      |      |
| <b>HS3ST2</b> | 3.03 |      |      |      | 2.03 |       |      |      |
| <b>HS6ST3</b> | 2.15 | 2.95 |      |      |      |       |      | 0.31 |
| <b>HSF2</b>   |      |      |      |      |      |       |      | 0.47 |
| <b>HTR7</b>   | 3.08 |      |      |      |      |       |      | 0.49 |
| <b>IBSP</b>   |      | 9.52 | 0.04 |      |      | 60.87 |      |      |
| <b>ICAM</b>   |      |      |      | 0.34 |      |       |      |      |
| <b>ID4</b>    | 2.77 |      |      |      |      |       |      | 0.31 |
| <b>IDO1</b>   |      |      | 0.17 |      | 2.52 |       |      | 0.50 |
| <b>IDO2</b>   | 7.77 |      |      | 0.34 |      |       |      |      |
| <b>IFI27</b>  |      | 2.88 | 0.15 |      | 3.48 | 12.43 |      |      |
| <b>IFI33L</b> |      |      | 0.10 |      | 4.08 | 3.86  |      |      |
| <b>IFNG</b>   | 2.09 |      |      | 0.34 |      |       |      |      |
| <b>IGF1</b>   |      | 4.41 | 0.31 |      |      |       | 0.47 |      |
| <b>IGF1R</b>  |      |      |      |      |      |       |      | 0.49 |
| <b>IGF2</b>   |      |      | 0.41 |      |      | 3.57  |      |      |
| <b>IGFBP1</b> |      |      | 0.27 |      |      | 7.13  |      |      |
| <b>IGFBP2</b> | 2.05 |      |      |      |      |       |      | 0.42 |
| <b>IGFBP3</b> |      |      | 0.33 |      |      |       |      |      |

|               |      |      |      |      |      |       |      |      |
|---------------|------|------|------|------|------|-------|------|------|
| <b>IGFBP5</b> | 2.68 |      |      |      |      |       |      | 0.45 |
| <b>IHH</b>    | 3.77 |      |      | 0.34 | 3.93 |       |      | 0.28 |
| <b>IL10</b>   | 3.76 |      |      | 0.34 | 3.62 | 2.59  |      |      |
| <b>IL11</b>   |      | 6.20 | 0.09 |      |      | 11.97 |      |      |
| <b>IL13</b>   |      |      |      | 0.34 |      |       | 0.47 | 0.30 |
| <b>IL15</b>   |      |      | 0.45 |      |      |       |      |      |
| <b>IL15</b>   |      |      |      | 0.34 |      |       |      |      |
| <b>IL17A</b>  | 2.33 |      |      | 0.34 | 3.01 | 4.22  |      |      |
| <b>IL1A</b>   | 2.42 |      |      |      |      |       | 0.36 | 0.22 |
| <b>IL1B</b>   |      | 3.03 | 0.30 |      |      |       |      | 0.23 |
| <b>IL1R2</b>  | 4.01 |      |      | 0.36 | 2.72 | 2.06  |      |      |
| <b>IL1RN</b>  |      | 3.21 | 0.22 |      | 2.71 | 2.14  |      |      |
| <b>IL2</b>    | 2.52 |      |      | 0.34 |      |       |      | 0.28 |
| <b>IL31R4</b> | 2.10 |      |      | 0.34 |      |       |      |      |
| <b>IL32</b>   |      | 2.30 | 0.15 |      |      | 2.88  | 0.27 |      |
| <b>IL4</b>    |      |      |      | 0.34 |      |       |      |      |
| <b>IL5</b>    | 6.42 |      |      | 0.34 | 2.03 |       |      |      |
| <b>IL7</b>    | 3.83 |      |      |      | 2.55 |       |      |      |
| <b>INHA</b>   |      | 2.10 | 0.37 |      |      |       | 0.41 | 0.45 |
| <b>ITGB8</b>  |      | 2.58 | 0.23 |      |      |       |      |      |
| <b>JAG1</b>   | 3.59 |      |      |      |      |       |      |      |
| <b>JPH3</b>   | 2.95 | 2.13 |      |      |      |       |      | 0.42 |
| <b>KAT6A</b>  |      | 2.63 |      |      |      |       |      |      |
| <b>KCNE3</b>  |      |      |      | 0.34 |      |       | 0.31 |      |
| <b>KCNMB4</b> |      |      |      | 0.37 |      |       |      |      |
| <b>KCNS3</b>  | 2.28 |      |      |      |      |       |      |      |
| <b>KRT14</b>  |      |      |      | 0.44 |      |       | 0.21 |      |
| <b>KRT18</b>  | 2.06 |      |      |      |      |       |      |      |
| <b>KRT19</b>  | 4.91 |      |      |      | 3.37 |       |      |      |
| <b>KYNU</b>   |      | 4.12 | 0.08 |      |      | 8.96  |      |      |
| <b>LAMP5</b>  |      |      |      |      |      | 2.88  |      |      |

|                 |       |      |      |      |      |       |      |      |
|-----------------|-------|------|------|------|------|-------|------|------|
| <b>LCN2</b>     |       | 7.71 | 0.09 |      |      | 9.38  |      |      |
| <b>LDB2</b>     | 9.85  |      |      |      |      |       | 0.31 | 0.11 |
| <b>LDHA</b>     |       |      | 0.41 |      |      | 2.24  |      |      |
| <b>LEPR</b>     |       |      | 0.34 | 0.35 |      |       |      | 0.35 |
| <b>LIF</b>      |       | 2.02 |      |      |      | 2.82  |      |      |
| <b>LMNB1</b>    |       |      | 0.23 | 0.44 |      | 7.57  |      |      |
| <b>LPAR4</b>    |       | 5.77 | 0.39 |      |      | 2.99  |      |      |
| <b>LPL</b>      | 4.52  |      |      |      |      |       |      | 0.15 |
| <b>LRRC15</b>   |       |      | 0.47 |      | 2.15 | 3.10  |      |      |
| <b>LRRN3</b>    |       | 5.02 | 0.19 |      |      |       |      |      |
| <b>LRRN4CL</b>  | 2.13  |      |      |      |      |       |      | 0.47 |
| <b>LSP1</b>     | 3.17  |      |      | 0.39 | 3.49 | 2.99  |      |      |
| <b>LYVE1</b>    | 2.55  |      |      | 0.34 |      | 2.18  |      |      |
| <b>MAB21L2</b>  | 2.05  |      |      | 0.34 |      |       |      |      |
| <b>MAP1LC3C</b> | 15.28 |      |      |      | 4.34 |       |      | 0.38 |
| <b>MAPK1</b>    | 3.76  |      |      |      |      |       |      |      |
| <b>MASP2</b>    | 5.92  |      |      | 0.30 | 2.38 |       |      | 0.43 |
| <b>MATN2</b>    | 2.08  |      |      |      |      |       |      | 0.42 |
| <b>MCAM</b>     |       | 2.32 | 0.19 |      |      | 3.98  |      |      |
| <b>MDM2</b>     | 4.30  |      |      |      |      |       |      | 0.21 |
| <b>MET</b>      |       |      | 0.48 |      |      | 2.71  |      |      |
| <b>MFAP3L</b>   |       | 3.20 | 0.27 |      |      |       |      |      |
| <b>MFAP4</b>    | 2.66  |      |      |      |      |       |      |      |
| <b>MFAP5</b>    | 2.97  |      |      |      |      |       |      | 0.32 |
| <b>MGP</b>      | 2.78  |      |      |      |      |       |      | 0.29 |
| <b>MKI67</b>    |       |      | 0.24 | 0.47 | 2.29 | 7.83  |      |      |
| <b>MMP1</b>     |       | 8.01 | 0.03 |      |      | 6.47  |      |      |
| <b>MMP10</b>    |       | 2.85 | 0.06 |      |      | 14.86 |      |      |
| <b>MMP12</b>    |       | 2.74 | 0.03 |      |      | 17.56 |      |      |
| <b>MMP13</b>    |       | 4.44 | 0.16 |      |      | 5.75  |      |      |
| <b>MMP3</b>     |       | 9.57 | 0.02 |      |      | 8.05  |      |      |



|                |      |      |      |      |      |       |      |      |
|----------------|------|------|------|------|------|-------|------|------|
| <b>MMP7</b>    |      | 2.45 | 0.30 |      |      |       |      |      |
| <b>MMP9</b>    |      |      | 0.44 |      |      |       |      |      |
| <b>MRAP</b>    | 2.63 |      |      | 0.34 | 2.50 |       |      | 0.31 |
| <b>MXRA7</b>   | 2.01 |      |      |      |      |       |      |      |
| <b>MYBPH</b>   | 2.93 |      |      | 0.41 | 4.89 |       |      | 0.43 |
| <b>MYL1</b>    | 2.43 |      |      | 0.34 |      |       |      | 0.46 |
| <b>MYLIP</b>   | 5.69 |      |      |      |      |       |      | 0.38 |
| <b>NAMPT</b>   |      | 2.47 | 0.13 |      |      | 2.72  |      |      |
| <b>NEFM</b>    |      |      | 0.25 |      |      | 2.49  | 0.32 |      |
| <b>NETO2</b>   |      |      | 0.38 |      |      | 3.97  |      |      |
| <b>NEURL3</b>  |      | 2.32 | 0.22 |      |      | 3.64  |      |      |
| <b>NFASC</b>   | 2.50 |      |      |      |      |       |      | 0.46 |
| <b>NFKB1</b>   |      |      | 0.45 |      |      |       |      |      |
| <b>NLGN4Y</b>  |      |      |      |      |      |       | 0.27 |      |
| <b>NOD2</b>    |      | 2.30 | 0.19 |      |      | 9.03  |      |      |
| <b>NODAL</b>   | 3.61 |      |      | 0.34 |      | 2.85  | 0.37 |      |
| <b>NOS2</b>    |      | 5.47 | 0.09 |      |      | 13.51 |      |      |
| <b>NPTX2</b>   |      | 2.55 |      |      |      |       |      |      |
| <b>NR3C2</b>   | 2.99 |      |      |      |      |       |      | 0.27 |
| <b>NR4A2</b>   | 2.06 |      |      |      |      |       |      | 0.46 |
| <b>NR4A3</b>   |      | 4.16 |      |      |      |       |      |      |
| <b>NRM</b>     |      |      |      |      |      | 2.14  |      |      |
| <b>NRXN3</b>   |      |      |      | 0.35 |      |       |      | 0.24 |
| <b>NTF4</b>    | 4.06 |      |      | 0.33 |      |       |      |      |
| <b>OGN</b>     | 5.60 |      |      |      |      |       |      | 0.22 |
| <b>OLFML2A</b> | 2.90 |      |      |      |      |       |      | 0.42 |
| <b>OLFML2B</b> | 7.50 |      |      |      |      |       |      |      |
| <b>OMD</b>     | 6.96 |      |      | 0.32 |      | 4.17  | 0.34 |      |
| <b>PBK</b>     |      |      | 0.26 | 0.45 |      | 11.45 |      |      |
| <b>PDE5A</b>   | 2.75 |      |      |      |      |       |      | 0.35 |
| <b>PDGFRA</b>  | 2.00 |      |      |      |      |       |      | 0.45 |

|                      |      |       |      |      |      |       |      |      |
|----------------------|------|-------|------|------|------|-------|------|------|
| <b><i>PDGFRB</i></b> | 4.14 |       |      |      |      |       |      | 0.32 |
| <b><i>PDIA4</i></b>  |      |       | 0.44 |      |      | 2.04  |      |      |
| <b><i>PENK</i></b>   |      |       | 0.25 |      |      | 2.45  | 0.46 |      |
| <b><i>PERP</i></b>   | 3.62 |       |      |      |      |       |      | 0.17 |
| <b><i>PGF</i></b>    | 3.56 |       |      |      |      |       |      | 0.24 |
| <b><i>PLCB4</i></b>  | 2.91 |       |      |      |      |       |      |      |
| <b><i>PLCB4</i></b>  |      | 1.99  |      |      |      |       |      |      |
| <b><i>PLIN1</i></b>  |      |       |      |      |      |       |      | 0.47 |
| <b><i>PLPP3</i></b>  | 2.04 |       |      |      |      |       |      |      |
| <b><i>PODXL</i></b>  |      |       | 0.17 |      |      | 9.51  |      |      |
| <b><i>POSTN</i></b>  |      |       |      |      |      | 2.90  |      |      |
| <b><i>PPL</i></b>    | 2.41 |       |      |      |      |       |      | 0.43 |
| <b><i>PRELP</i></b>  |      | 3.93  |      |      |      |       |      | 0.24 |
| <b><i>PRL</i></b>    |      | 15.20 | 0.01 |      |      | 12.98 | 0.40 |      |
| <b><i>PTGDS</i></b>  |      |       | 0.44 |      |      |       |      |      |
| <b><i>PTGFR</i></b>  |      | 3.65  | 0.25 |      |      |       |      |      |
| <b><i>PTGS2</i></b>  |      | 2.28  |      |      |      |       |      |      |
| <b><i>PTHLH</i></b>  |      | 3.53  |      |      |      |       |      |      |
| <b><i>PTN</i></b>    | 3.23 |       |      |      |      |       |      | 0.36 |
| <b><i>PTX3</i></b>   |      |       | 0.18 |      |      | 3.15  |      |      |
| <b><i>REEP1</i></b>  | 4.07 |       |      | 0.41 |      |       | 0.32 | 0.29 |
| <b><i>RETN</i></b>   |      |       | 0.37 | 0.35 |      | 2.17  | 0.39 |      |
| <b><i>RNF128</i></b> |      | 2.05  |      |      |      |       |      | 0.50 |
| <b><i>RNF130</i></b> |      |       | 0.29 | 0.35 |      |       |      | 0.44 |
| <b><i>RSP03</i></b>  |      | 3.16  | 0.24 |      |      |       |      |      |
| <b><i>S100A8</i></b> |      |       |      | 0.34 |      | 3.18  |      |      |
| <b><i>S100A9</i></b> |      |       |      | 0.34 |      | 3.26  |      |      |
| <b><i>SAA2</i></b>   |      | 13.34 | 0.01 |      |      | 68.21 |      |      |
| <b><i>SCARA5</i></b> |      | 6.01  |      |      |      | 2.40  | 0.30 |      |
| <b><i>SCCA2</i></b>  |      |       |      | 0.41 | 3.16 |       |      |      |
| <b><i>SCD</i></b>    |      |       |      |      |      | 2.00  |      |      |

|                        |       |      |      |      |      |       |      |      |
|------------------------|-------|------|------|------|------|-------|------|------|
| <b><i>SDC4</i></b>     |       |      |      |      |      | 2.13  |      |      |
| <b><i>SCIN</i></b>     | 4.99  |      |      |      |      |       |      | 0.21 |
| <b><i>SCRGI</i></b>    | 5.46  |      |      |      |      |       |      |      |
| <b><i>SEL1L</i></b>    | 2.29  | 4.49 |      |      |      |       |      | 0.31 |
| <b><i>SEMA3F</i></b>   | 3.16  |      |      |      | 2.03 | 2.24  |      |      |
| <b><i>SEPP1</i></b>    | 3.77  | 3.19 |      |      |      |       |      | 0.26 |
| <b><i>SERPINB2</i></b> | 3.30  |      |      | 0.37 |      |       |      | 0.11 |
| <b><i>SFRP1</i></b>    |       |      | 0.23 |      |      | 3.07  |      |      |
| <b><i>SGCG</i></b>     | 2.59  |      |      |      |      |       |      | 0.25 |
| <b><i>SHISA2</i></b>   |       | 2.61 | 0.23 |      |      |       |      |      |
| <b><i>SIX1</i></b>     |       | 2.07 |      |      |      |       |      |      |
| <b><i>SLC16A3</i></b>  |       |      | 0.33 |      |      | 2.23  |      |      |
| <b><i>SLC24A1</i></b>  | 5.41  | 2.90 |      |      |      | 2.10  |      |      |
| <b><i>SLC27A2</i></b>  |       |      | 0.37 | 0.36 |      | 2.15  |      |      |
| <b><i>SLC40A1</i></b>  | 19.42 |      |      |      |      |       |      | 0.09 |
| <b><i>SLC44A1</i></b>  | 2.46  |      |      |      |      |       | 0.37 | 0.48 |
| <b><i>SLC7A1</i></b>   |       |      | 0.44 |      |      | 2.45  |      |      |
| <b><i>SLC7A2</i></b>   |       | 7.61 | 0.04 |      |      | 16.00 |      |      |
| <b><i>SLC7A7</i></b>   |       | 2.02 |      |      |      |       | 0.49 |      |
| <b><i>SLPI</i></b>     |       | 2.63 | 0.40 |      |      |       |      |      |
| <b><i>SMOC2</i></b>    | 11.27 |      |      |      |      |       |      | 0.13 |
| <b><i>SNAI2</i></b>    | 3.35  |      |      |      |      |       |      |      |
| <b><i>SNED1</i></b>    |       |      | 0.34 |      |      |       |      |      |
| <b><i>SOSTDC1</i></b>  | 2.42  |      |      | 0.34 | 2.11 |       |      |      |
| <b><i>SOX4</i></b>     |       | 2.08 |      |      |      |       |      |      |
| <b><i>SOX9</i></b>     | 2.61  |      |      |      |      |       |      |      |
| <b><i>SPARC</i></b>    | 2.54  |      |      |      | 2.34 |       |      |      |
| <b><i>SRD5A3</i></b>   |       |      |      |      |      | 2.11  |      |      |
| <b><i>STC1</i></b>     |       | 4.68 | 0.04 |      |      | 5.22  |      |      |
| <b><i>STEAP4</i></b>   |       |      | 0.22 |      |      | 4.07  | 0.38 |      |
| <b><i>SYT4</i></b>     | 3.39  |      |      | 0.36 |      |       |      | 0.26 |

|                                      |      |       |      |      |      |       |      |      |
|--------------------------------------|------|-------|------|------|------|-------|------|------|
| <b><i>TBX2</i></b>                   |      |       |      |      |      | 2.22  |      |      |
| <b><i>TBX3</i></b>                   |      |       | 0.48 |      |      |       |      |      |
| <b><i>TDO2</i></b>                   |      |       |      | 0.41 | 4.22 |       |      | 0.47 |
| <b><i>TENM1</i></b>                  | 2.12 |       |      | 0.35 |      |       |      |      |
| <b><i>TERT</i></b>                   |      |       |      | 0.35 | 2.30 |       |      |      |
| <b><i>TFAP2A</i></b>                 |      |       |      | 0.34 |      | 2.09  |      |      |
| <b><i>TFR2</i></b>                   |      | 2.14  | 0.33 |      |      | 2.66  | 0.47 |      |
| <b><i>TGFB1</i></b>                  | 2.82 |       |      | 0.36 | 2.33 |       |      | 0.31 |
| <b><i>TGFB3</i></b>                  |      |       |      |      |      |       |      | 0.37 |
| <b><i>THBS1</i></b>                  |      |       | 0.34 |      |      | 2.13  |      |      |
| <b><i>THBS2</i></b>                  | 2.14 |       |      |      |      |       |      | 0.43 |
| <b><i>THBS3</i></b>                  | 2.07 |       |      |      |      |       |      |      |
| <b><i>TIMP3</i></b>                  | 4.07 |       |      |      |      |       |      | 0.25 |
| <b><i>TLR2</i></b>                   |      |       | 0.10 | 0.35 |      | 2.07  |      |      |
| <b><i>TMEM106A</i></b>               |      |       |      |      |      | 2.56  |      |      |
| <b><i>TMEM27</i></b>                 | 2.32 | 2.44  |      |      |      |       | 0.31 | 0.30 |
| <b><i>TMEM71</i></b>                 |      | 2.07  | 0.32 |      |      | 3.11  |      |      |
| <b><i>TNF<math>\alpha</math></i></b> |      | 2.48  | 0.27 |      |      | 2.25  | 0.40 |      |
| <b><i>TNFAIP6</i></b>                |      | 10.83 | 0.03 |      |      | 5.03  |      |      |
| <b><i>TNFAIP8</i></b>                |      | 2.05  | 0.33 |      |      | 2.19  |      |      |
| <b><i>TNFRSF11B</i></b>              |      |       | 0.40 |      |      | 2.08  |      |      |
| <b><i>TNFRSF1B</i></b>               |      |       | 0.22 |      |      | 3.84  |      |      |
| <b><i>TNMD</i></b>                   | 2.11 |       |      | 0.37 |      |       |      |      |
| <b><i>TOP2A</i></b>                  |      |       | 0.22 |      |      | 9.49  |      |      |
| <b><i>TP63</i></b>                   |      |       | 0.19 | 0.30 | 2.50 | 11.37 |      |      |
| <b><i>TPH1</i></b>                   | 2.46 |       |      | 0.39 |      |       |      | 0.27 |
| <b><i>TSKU</i></b>                   |      |       | 0.35 |      |      |       |      |      |
| <b><i>TUBB1</i></b>                  |      |       |      | 0.32 |      |       |      | 0.38 |
| <b><i>TUSC3</i></b>                  | 2.00 |       |      |      |      |       |      |      |
| <b><i>TWIST2</i></b>                 | 2.51 | 2.24  |      |      |      |       |      | 0.41 |
| <b><i>UBE2B</i></b>                  | 2.18 |       |      |      |      |       |      | 0.47 |

|              |      |      |      |      |      |      |      |      |
|--------------|------|------|------|------|------|------|------|------|
| <i>VCAM1</i> |      | 2.09 | 0.21 |      |      | 2.30 |      |      |
| <i>VEGFD</i> | 2.17 | 2.98 |      |      | 2.59 |      |      | 0.22 |
| <i>VEGFR</i> |      |      |      | 0.35 |      |      |      |      |
| <i>VIT</i>   | 7.02 |      |      |      |      |      |      | 0.26 |
| <i>WNT11</i> |      | 2.20 | 0.40 |      |      | 2.31 | 0.39 |      |
